# Supplementary material
Source: Springer Nature journal article supplement (https://www.springermedizin.de/resource/supplementary/13058_2010_2744_MOESM5_ESM.pdf/9702068)

**A**

IB: c-myc

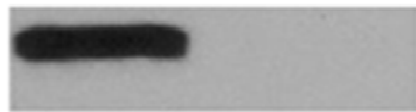

IB: Runx2

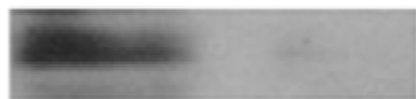IB:  $\beta$ -actin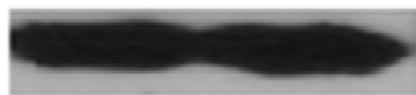

Runx2

pcDNA3

c-myc

**B**

0-h

6-h

12-h

18-h

24-h

MCF7  
pcDNA3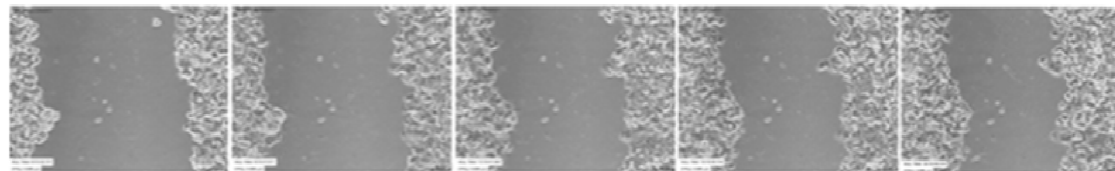MCF7  
Myc-Runx2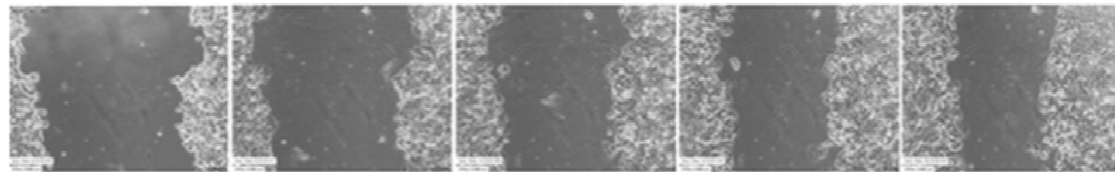

Overlay

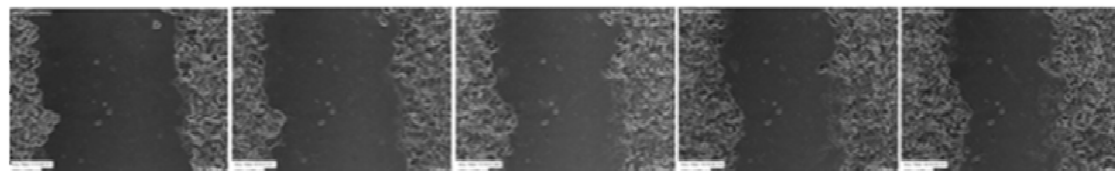**C**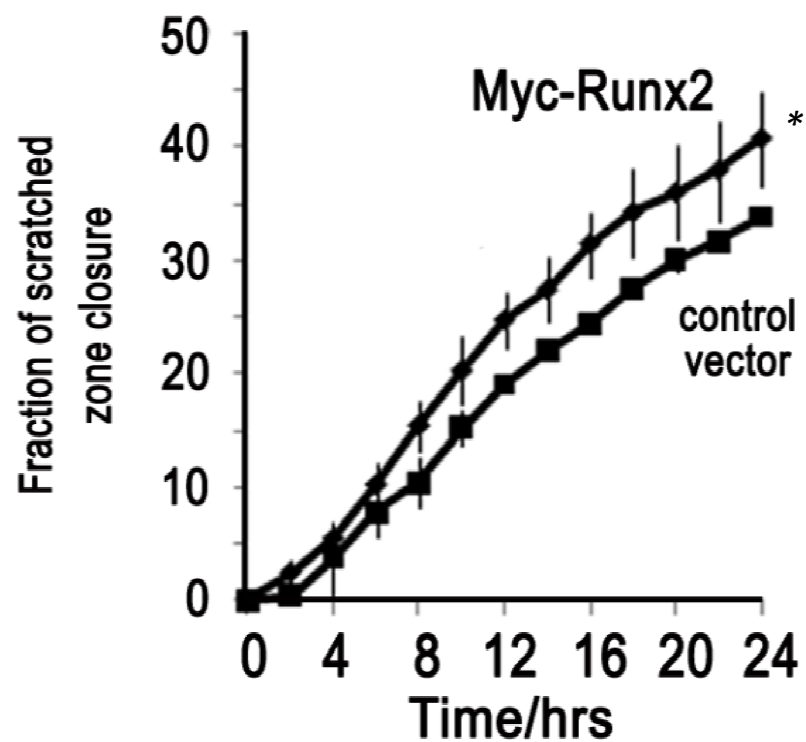

Supplement: MOESM5 [file 9702068]
